# Supplementary material for: Dissecting human embryonic skeletal stem cell ontogeny by single-cell transcriptomic and functional analyses
Source: PubMed Central journal article supplement (PMC8249634; doi:10.1038/s41422-021-00467-z), 2021-01-20
Supplement: 41422_2021_467_MOESM1_ESM.pdf [file 41422_2021_467_MOESM1_ESM.pdf]

**Figure S1**

**a**

| Stage              | Sample      | Dpf <sup>b</sup> | Tissue                        | Strategy          | Marker                                                          | Gender | Cell Number | Doublts | Cell Number (QC <sup>c</sup> ) | Gene number | UMI number | Perc.mito <sup>d</sup> |
|--------------------|-------------|------------------|-------------------------------|-------------------|-----------------------------------------------------------------|--------|-------------|---------|--------------------------------|-------------|------------|------------------------|
| 5 WPC <sup>a</sup> | Embryo 1    | 30               | Limb bud                      | scRNA-seq         | 7AAD <sup>+</sup><br>CD235A <sup>+</sup>                        | Male   | 6,248       | 315     | 5,300                          | 3,443       | 13,741     | 2.5%                   |
|                    | Embryo 2    | 36               | Limb bud                      | scRNA-seq         |                                                                 | Female | 8,675       | 606     | 7,351                          | 3,508       | 13,079     | 2.8%                   |
|                    | Embryo 3    | 36               | Limb bud                      | scRNA-seq         |                                                                 | Male   | 9,119       | 670     | 7,239                          | 3,119       | 10,759     | 2.2%                   |
| 8 WPC              | Embryo 4    | 49               | Long bone                     | scRNA-seq         |                                                                 | Female | 4,786       | 185     | 4,375                          | 2,253       | 7,159      | 1.5%                   |
|                    | Embryo 5    | 55               | Long bone                     | scRNA-seq         |                                                                 | Male   | 6,645       | 356     | 5,745                          | 2,386       | 8,760      | 1.9%                   |
|                    | Embryo 6    | 55               | Long bone                     | scRNA-seq         |                                                                 | Female | 6,431       | 334     | 5,560                          | 1,955       | 6,247      | 2.3%                   |
|                    | Embryo 7    | 56               | Long bone                     | scRNA-seq         | PDGFRA <sup>low</sup> /<br>PDPN <sup>+</sup> CADM1 <sup>+</sup> | Female | 334         | NA      | 314                            | 1,739       | 4,741      | 1.4%                   |
|                    | Embryo 8-10 | 55               | Long bone                     | Nonclonal culture |                                                                 |        |             |         |                                |             |            |                        |
| Embryo 11-12       | 55          | Long bone        | Clonal culture                |                   |                                                                 |        |             |         |                                |             |            |                        |
| Embryo 13-15       | 56          | Long bone        | Clonal culture                |                   |                                                                 |        |             |         |                                |             |            |                        |
| Embryo 16-19       | 56          | Long bone        | Transplant                    |                   |                                                                 |        |             |         |                                |             |            |                        |
| Embryo 20-21       | 36          | Limb bud         | H&E staining                  |                   |                                                                 |        |             |         |                                |             |            |                        |
| Embryo 22-23       | 56          | Long bone        | H&E, IF <sup>e</sup> staining |                   |                                                                 |        |             |         |                                |             |            |                        |

<sup>a</sup>WPC: weeks post conception; <sup>b</sup>Dpf: days post fertilization;  
<sup>c</sup>QC: quality control; <sup>d</sup>Perc.mito: percentage of mitochondrial genes  
<sup>e</sup>IF: immunofluorescence

**b**

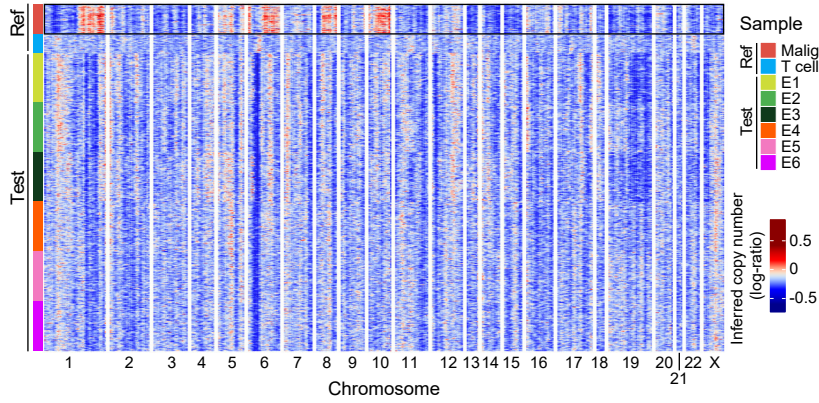

**c**

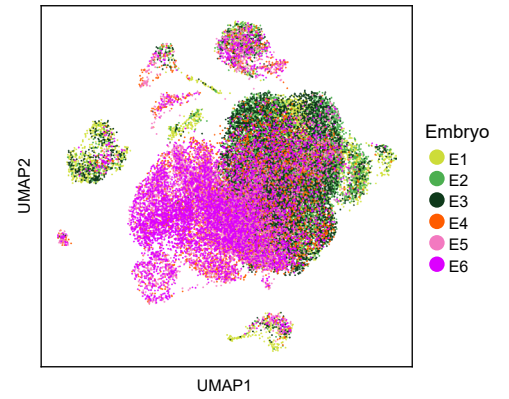

**d**

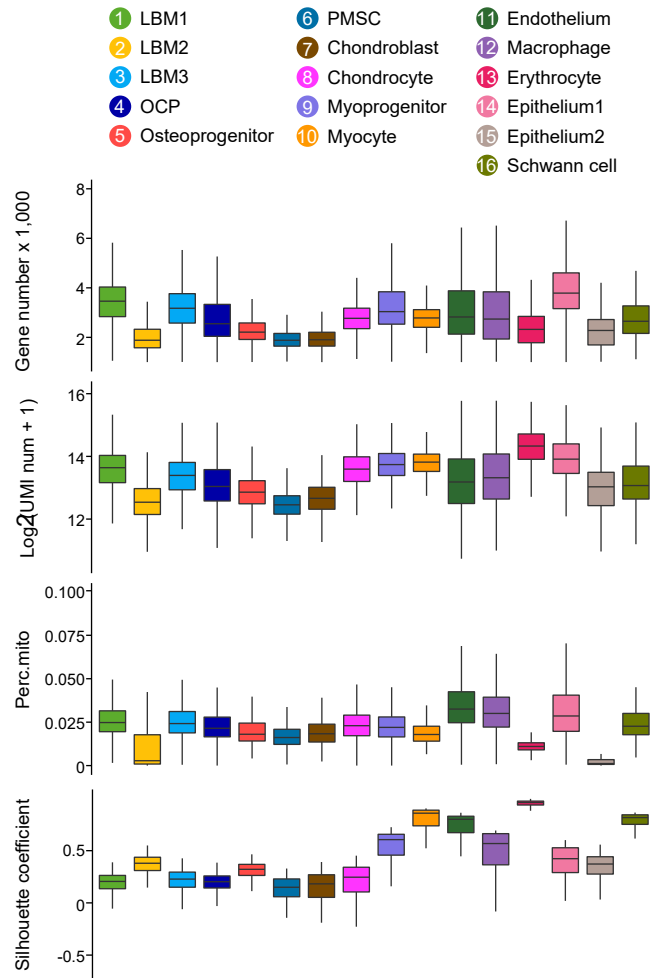

**e**

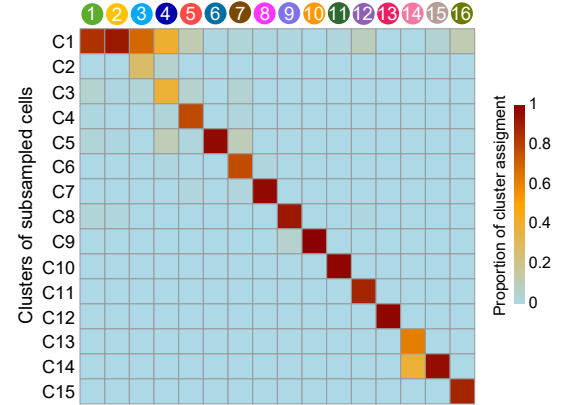

**f**

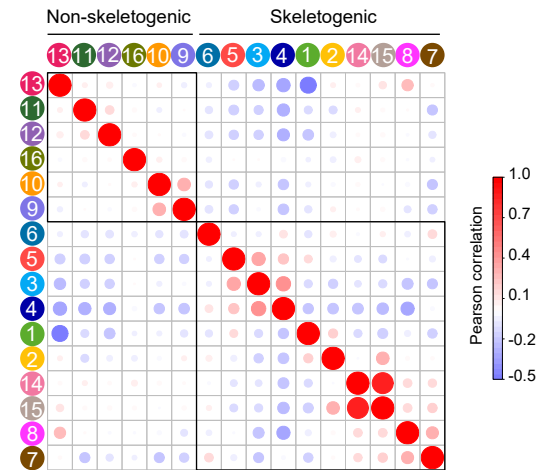

**Supplementary Fig. 1.** Sample information and data quality control

**a,** Table summary of human embryonic limb bud and long bone samples and detailed scRNA-seq information.

**b,** CNV scores inferred from transcriptomes of tumor cells, normal T cells (reference cell type) and 100 randomly selected cells from the 6 embryos analyzed by scRNA-seq (test cells). Red: amplifications; Blue: deletions.

**c,** UMAP visualization of the 6 embryos analyzed by scRNA-seq. These included 5 WPC limb buds (E1-3) and 8 WPC long bones (E4-6).

**d,** Boxplot showing the number of detected genes, log-transformed UMI counts, percentage of mitochondrial genes and Silhouette coefficient for each subset.

**e,** Assessment of the 15 clusters from 6,000 randomly subsampled cells (1000 cells from each embryo) to the 16 subsets annotated in Fig. 1c.

**f,** Pearson correlation analysis showing the relationship among the 16 subsets. Hierarchical clustering according to Pearson correlation distinguished skeletogenic (clusters 1-8, 14, 15) and non-skeletogenic subsets (clusters 9-13 and 16).
