# Supplementary material for: Dissecting human embryonic skeletal stem cell ontogeny by single-cell transcriptomic and functional analyses
Source: PubMed Central journal article supplement (PMC8249634; doi:10.1038/s41422-021-00467-z), 2021-01-20
Supplement: 41422_2021_467_MOESM2_ESM.pdf [file 41422_2021_467_MOESM2_ESM.pdf]

Figure S2

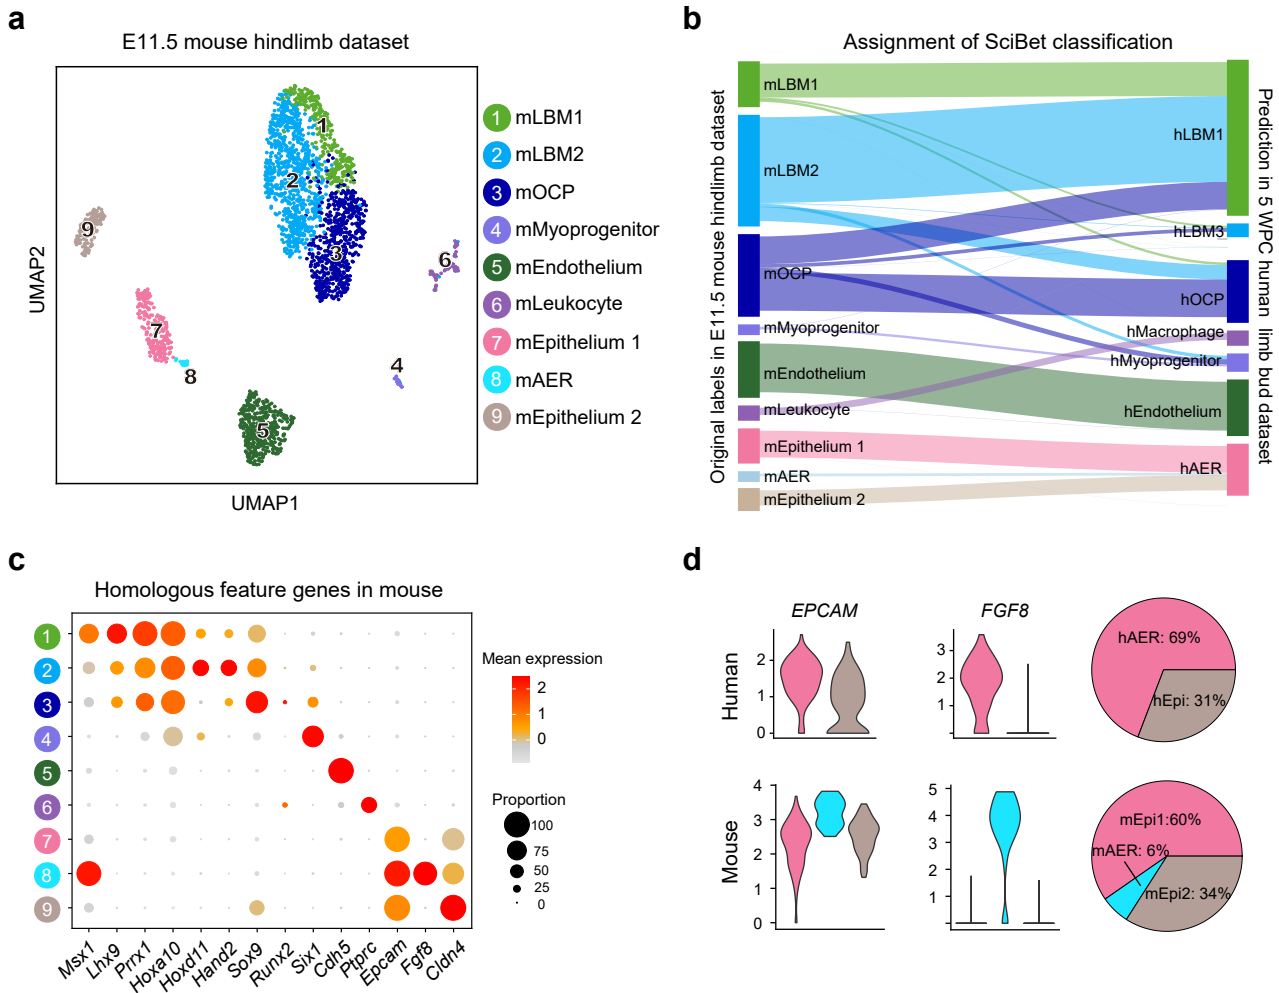

**Supplementary Fig. 2.** Characterization of E11.5 mouse hindlimb bud mesenchyme and epithelium

**a**, UMAP visualization of 9 cell subsets in E11.5 mouse hindlimb bud dataset. Expression matrix was re-processed and cells were clustered according to the expression of homologous feature genes in human limb bud.

**b**, Sankey diagram for assigning E11.5 mouse hindlimb bud subsets to 5 WPC human limb bud datasets.

**c**, Dot plots of mean expression of homologous feature genes in E11.5 mouse hindlimb bud subsets.

**d**, Violin plots (left) showing the gene expression of *EPCAM* and *FGF8* in human and mouse epithelial subsets. Pie charts (right) showing the proportions of each epithelial subset.
