# Supplementary material for: Dissecting human embryonic skeletal stem cell ontogeny by single-cell transcriptomic and functional analyses
Source: PubMed Central journal article supplement (PMC8249634; doi:10.1038/s41422-021-00467-z), 2021-01-20
Supplement: 41422_2021_467_MOESM3_ESM.pdf [file 41422_2021_467_MOESM3_ESM.pdf]

**Figure S3**

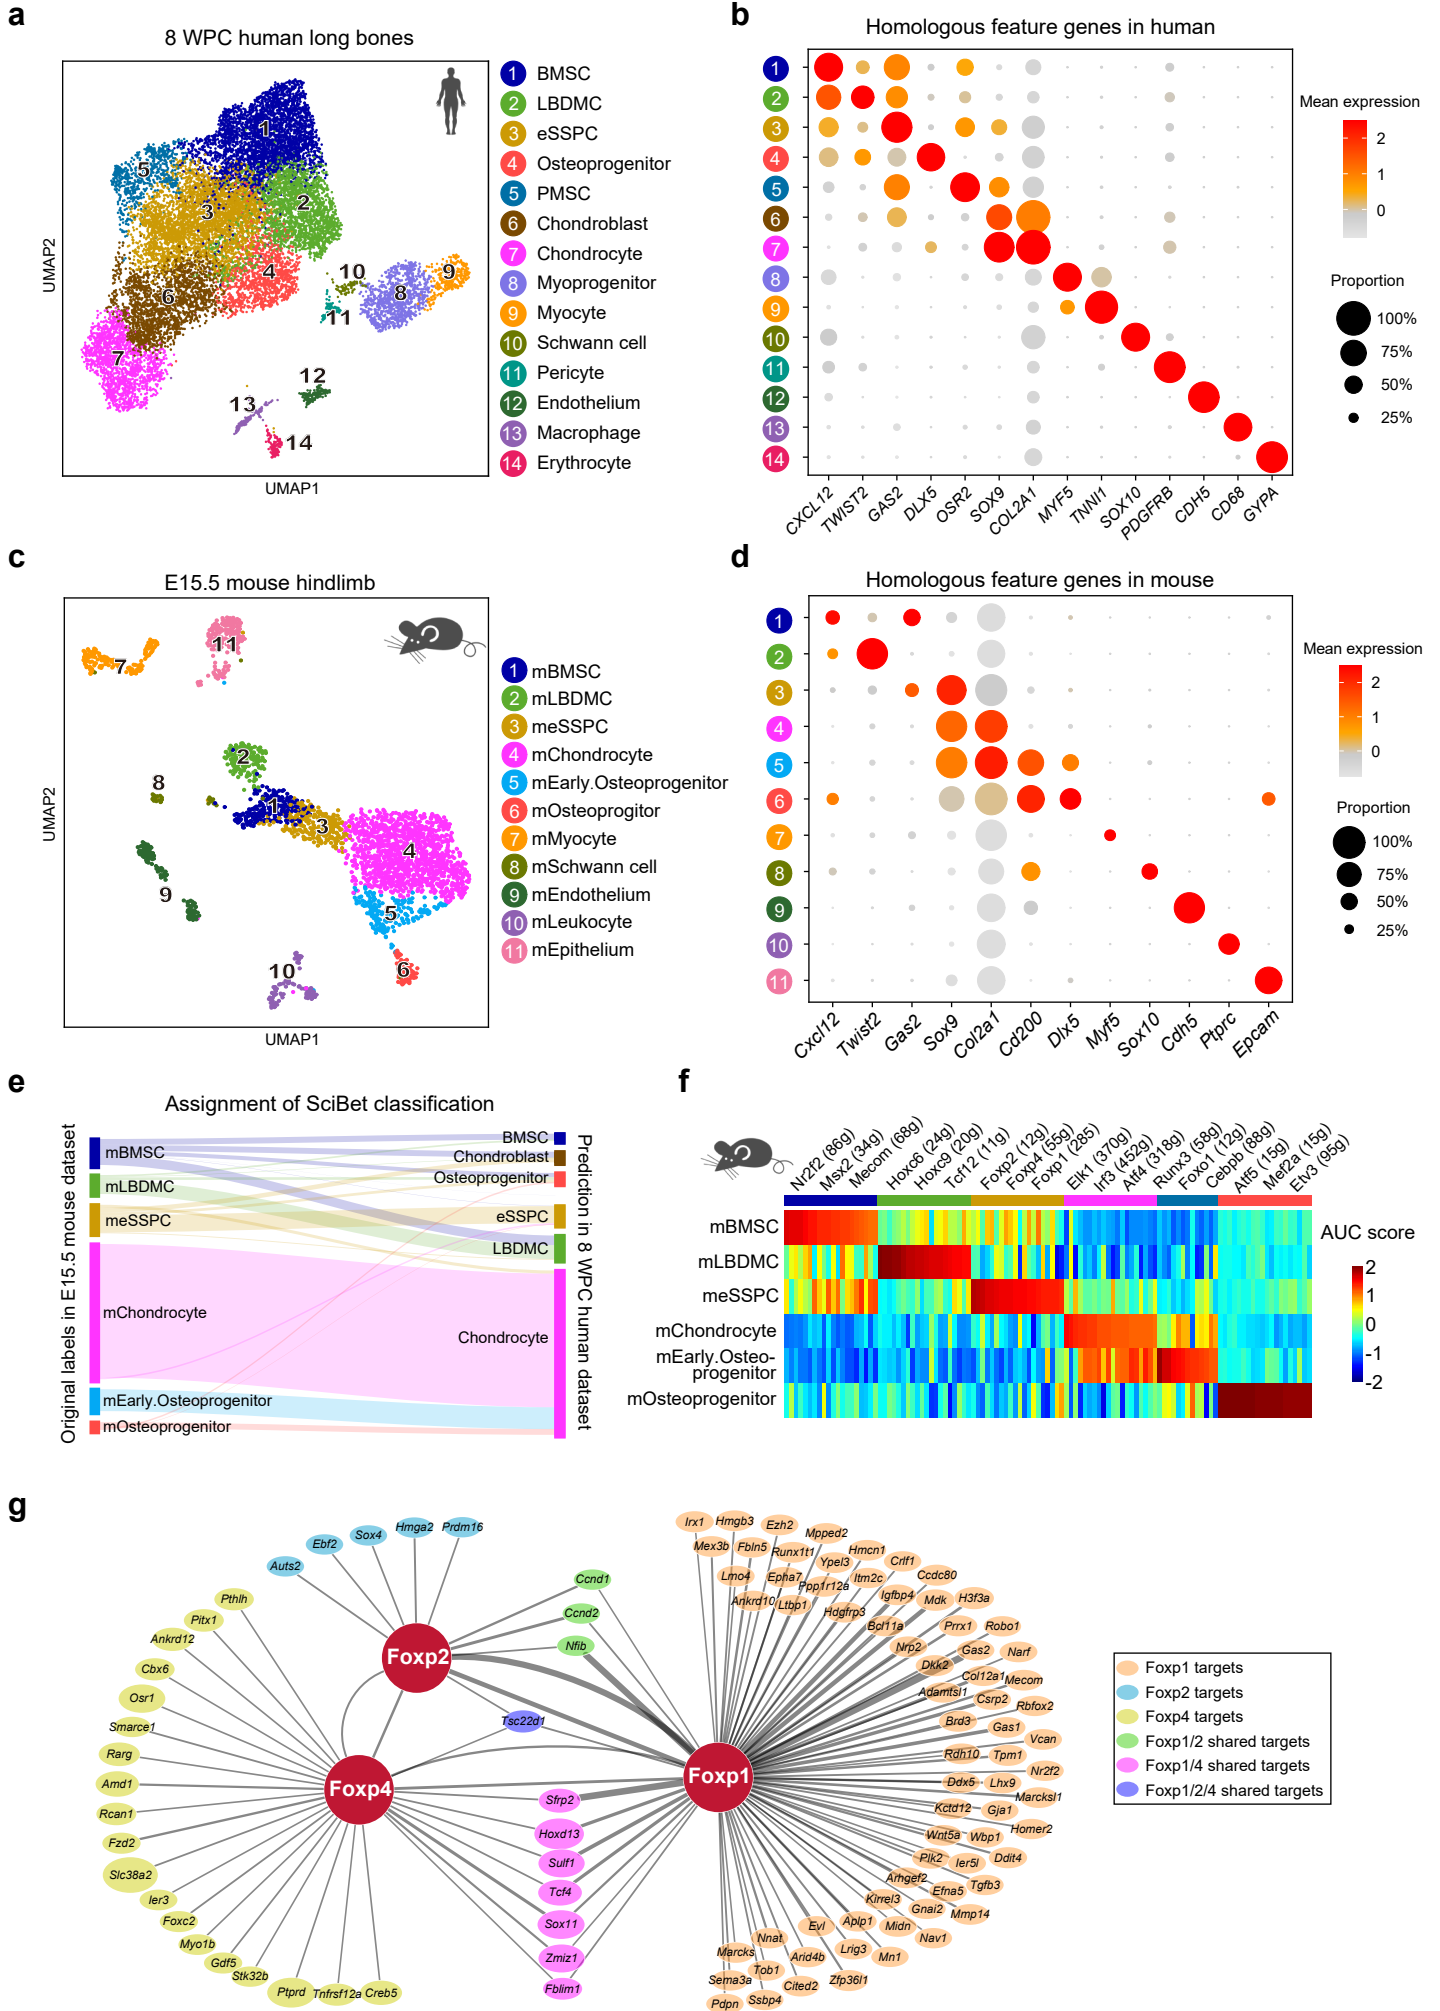

**Supplementary Fig. 3.** Cross-species comparison between human and mouse embryonic long bones during POC formation

**a,** UMAP plot of the 14 subsets in 8 WPC human long bones.

**b,** Dot plots showing the expression of human homologous feature genes in the 14 subsets indicated in **(a)**.

**c,** UMAP plot of the 11 subsets in re-processed E15.5 mouse hindlimb dataset.

**d,** Dot plots showing the expression of mouse homologous feature genes in the 11 mouse hindlimb subsets indicated in **(c)**.

**e,** Sankey diagram for assigning mouse E15.5 hindlimb datasets to human 8 WPC long bone datasets.

**f,** Heatmap showing the AUC scores of regulons enriched in mouse OCLC subsets. Z-score (column scaling) was calculated. Representative regulons were shown on the top.

**g,** The *Foxp1/2/4* regulon networks in mouse OCLC subsets. Lines thickness indicated the level of GENIE3 weights. Dot size indicated the number of enriched TF motifs.
