# Supplementary material for: Dissecting human embryonic skeletal stem cell ontogeny by single-cell transcriptomic and functional analyses
Source: PubMed Central journal article supplement (PMC8249634; doi:10.1038/s41422-021-00467-z), 2021-01-20
Supplement: 41422_2021_467_MOESM4_ESM.pdf [file 41422_2021_467_MOESM4_ESM.pdf]

**Figure S4**

**a**

Transcript-averaged cell scoring (TACS)

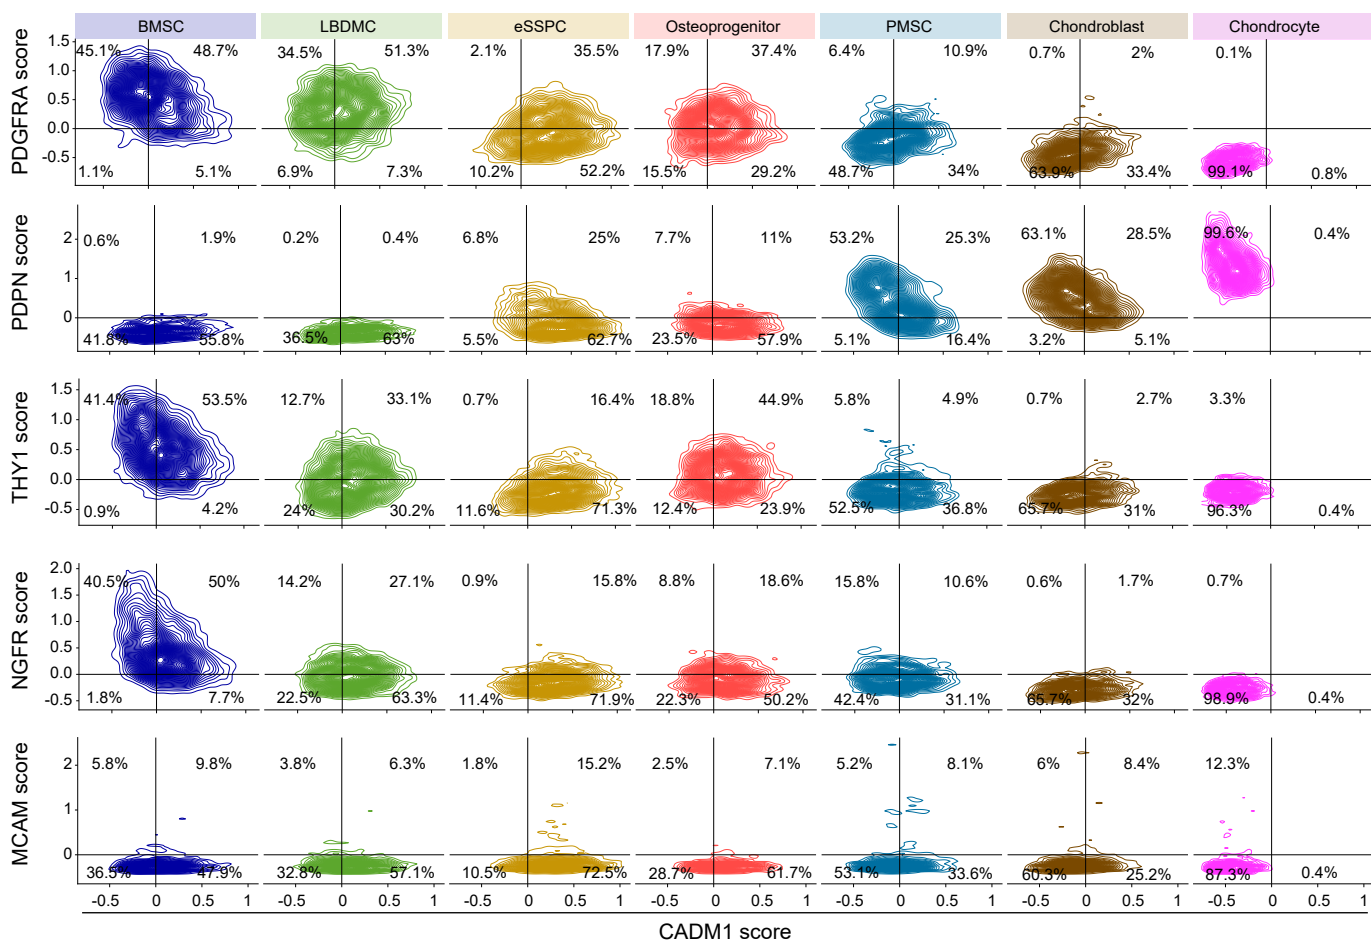

**b**

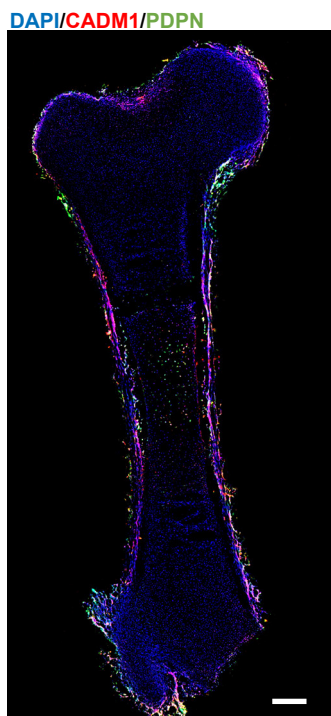

**f**

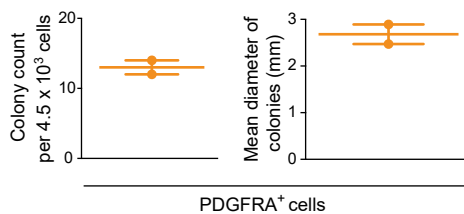

**c**

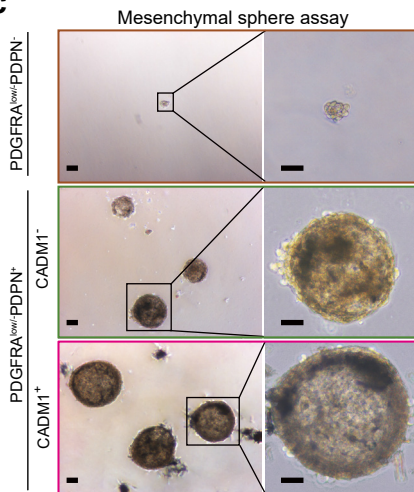

**d**

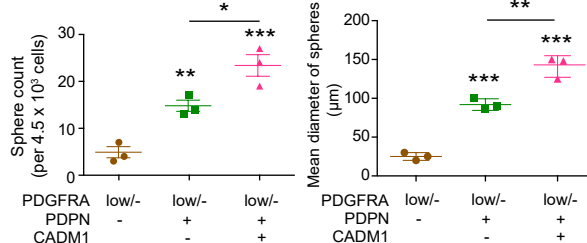

**e**

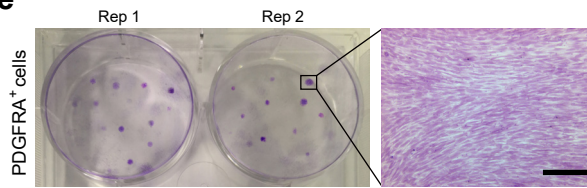

**g**

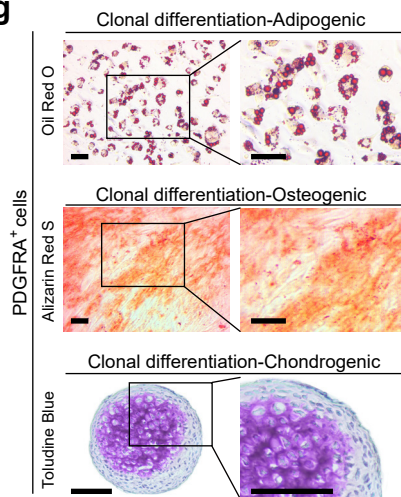

**h**

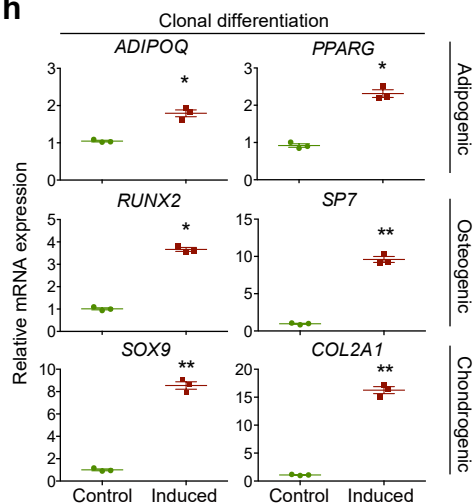

**Supplementary Fig. 4.** Further in silico and functional analyses of eSSPCs and PDGFRA<sup>+</sup> cells  
**a**, TACS plots showing the distribution of each OCLC subset between indicated surface marker pairs. Contours outlined regions of increasingly higher cell density. Cell frequencies were shown on the plots.

**b**, Representative immunofluorescent image of 8 WPC human femur section stained with DAPI (blue), CADM1 (red) and PDPN (green) (n=2 embryos). Scale bar: 200  $\mu$ m.

**c**, Representative images showing the mesenchymal spheres formed by the 3 populations sorted as in Fig. 4c (left), with magnified views (right). Scale bars: 25  $\mu$ m.

**d**, Quantifications of the number (left) and mean diameter (right) of mesenchymal spheres (n=3 embryos). The statistical significance of differences was determined using one-way ANOVA with multiple comparison tests (LSD). \*  $P < 0.05$ ; \*\*  $P < 0.01$ ; \*\*\*  $P < 0.001$ . Error bars indicated SEM.

**e**, Representative crystal violet staining of CFU-F colonies generated by flow cytometrically sorted PDGFRA<sup>+</sup> cells from two independent 8 WPC long bones. Magnified images of the boxed areas were shown on the right. Scale bar: 25  $\mu$ m.

**f**, Quantifications of the number (left) and mean diameter (right) of CFU-F colonies generated by flow cytometrically sorted PDGFRA<sup>+</sup> cells (n=2 embryos). Error bars indicated SEM.

**g** and **h**, Representative oil red O (top), alizarin red (middle) and toluidine blue (bottom) staining after adipogenic, osteogenic and chondrogenic differentiation of clonally expanded PDGFRA<sup>+</sup> cells (**g**) with qPCR quantifications (**h**). Magnified images of the boxed areas were shown on the right (n=2 embryos). Scale bars: 200  $\mu$ m. The statistical significance of differences was determined using Wilcoxon signed rank test. \*  $P < 0.05$ ; \*\*  $P < 0.01$ . Error bars indicated SEM.
