# Supplementary material for: Dissecting human embryonic skeletal stem cell ontogeny by single-cell transcriptomic and functional analyses
Source: PubMed Central journal article supplement (PMC8249634; doi:10.1038/s41422-021-00467-z), 2021-01-20
Supplement: 41422_2021_467_MOESM5_ESM.pdf [file 41422_2021_467_MOESM5_ESM.pdf]

**Figure S5**

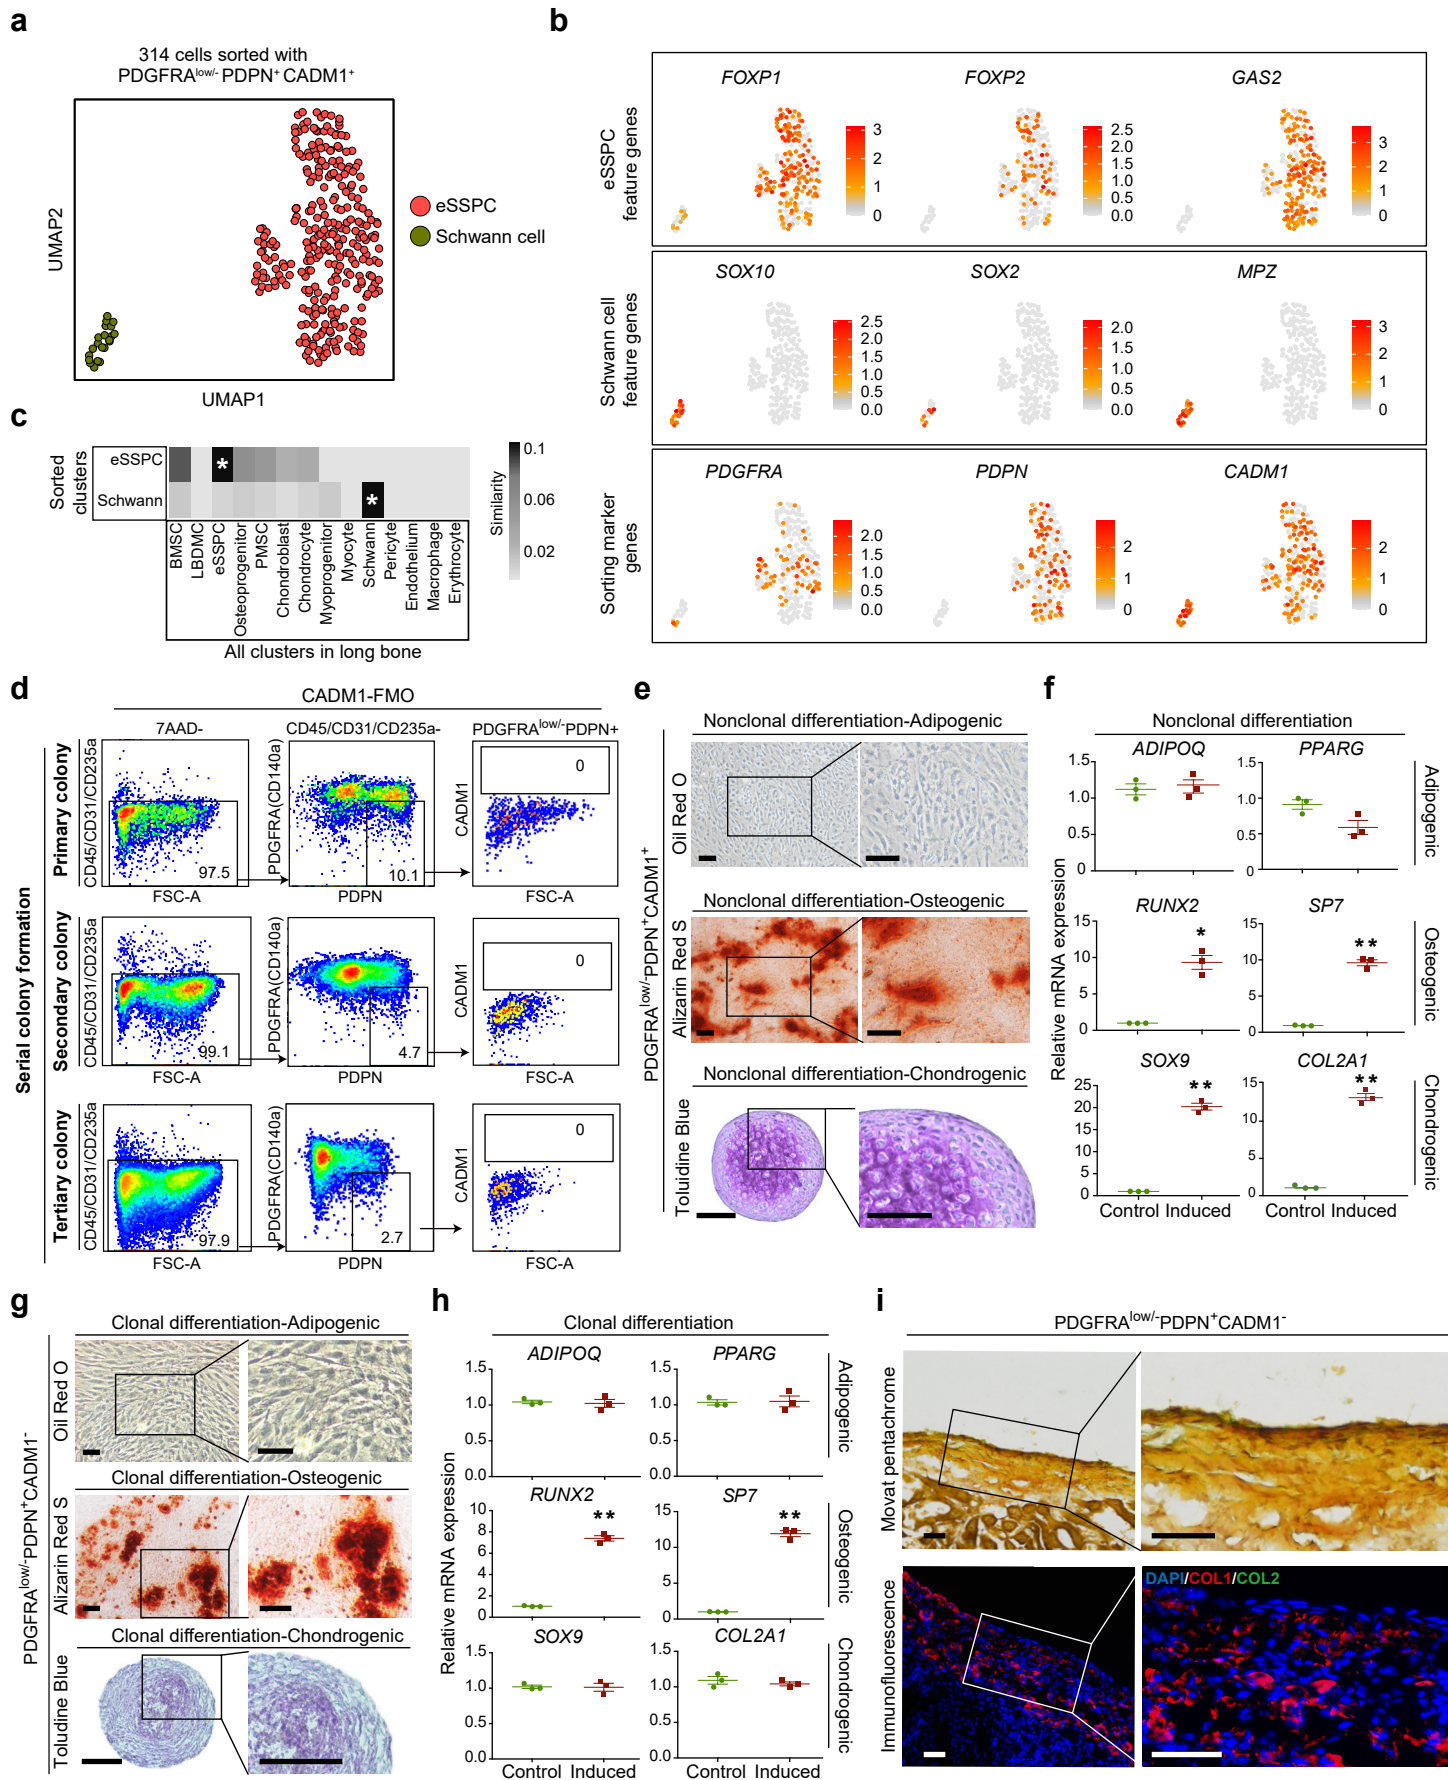

**Supplementary Fig. 5.** Validation of eSSPC phenotypic markers by scRNA-seq and further characterizations of PDGFRA<sup>low/-</sup>PDPN<sup>+</sup>CADM1<sup>+/-</sup> cells

**a**, Distribution of 314 PDGFRA<sup>low/-</sup>PDPN<sup>+</sup>CADM1<sup>+</sup> cells sorted from 8 WPC long bone. eSSPC and Schwann cell subsets were visualized by UMAP (n=1 embryo).

**b**, UMAP plots showing the expression of eSSPC feature genes (top), Schwann cell feature genes (middle) and sorting marker genes (bottom) in the cells of Fig.S5a.

**c**, Heatmap showing the Jaccard similarity of eSSPC and Schwann cell subsets in Fig.S5a and cell subsets of 8 WPC long bone datasets in Fig.S3a. Jaccard similarity was calculated using DEGs from different datasets. Asterisks indicated subsets with similarity > 0.1.

**d**, Fluorescence-minus-one (FMO) controls for eSSPC gating strategy in serial colony formation assay (Fig. 5a).

**e** and **f**, Representative oil red O (top), alizarin red S (middle) and toluidine blue (bottom) staining after adipogenic, osteogenic and chondrogenic differentiation of nonclonally expanded eSSPCs (PDGFRA<sup>low/-</sup>PDPN<sup>+</sup>CADM1<sup>+</sup>) (**e**) with qPCR quantifications (**f**) (n=3 embryos). Magnified images of the boxed areas were shown on the right. Scale bars: 200  $\mu$ m.

**g** and **h**, Representative oil red O (top), alizarin red S (middle) and toluidine blue (bottom) staining after adipogenic, osteogenic and chondrogenic differentiation of clonally expanded PDGFRA<sup>low/-</sup>PDPN<sup>+</sup>CADM1<sup>-</sup> cells (**g**) with qPCR quantifications (**h**) (n=3 clones). Magnified images of the boxed areas were shown on the right. Scale bars: 200  $\mu$ m.

**i**, Renal subcapsular transplantation of PDGFRA<sup>low/-</sup>PDPN<sup>+</sup>CADM1<sup>-</sup> cells. Movat pentachrome staining (top, bone and fibrous tissue: yellow) and immunofluorescent staining images (bottom, DAPI: blue, collagen I (COL I): red, collagen II (COL II): green) were shown (n=4 grafts from one embryo). Magnified images of the boxed areas were shown on the right. Scale bars: 50  $\mu$ m.

The statistical significance of differences was determined using Wilcoxon signed rank test.

\*  $P < 0.05$ ; \*\*  $P < 0.01$ . Error bars indicated SEM.
