# Supplementary material for: Dissecting human embryonic skeletal stem cell ontogeny by single-cell transcriptomic and functional analyses
Source: PubMed Central journal article supplement (PMC8249634; doi:10.1038/s41422-021-00467-z), 2021-01-20
Supplement: 41422_2021_467_MOESM6_ESM.pdf [file 41422_2021_467_MOESM6_ESM.pdf]

**Figure S6**

**a**

| Stage | Sample       | Dpf <sup>a</sup> | Tissue         | Strategy                                    | Gender | Cell Number | Doublets | Cell Number (QC <sup>b</sup> ) | Gene number | UMI number | Perc.mito <sup>c</sup> |
|-------|--------------|------------------|----------------|---------------------------------------------|--------|-------------|----------|--------------------------------|-------------|------------|------------------------|
| 8 WPC | Embryo 24    | 56               | Calvarial bone | scRNA-seq on 7AAD CD235A <sup>+</sup> cells | Male   | 3,786       | 338      | 2,932                          | 3,126       | 14,860     | 2.7%                   |
|       | Embryo 25    |                  |                |                                             |        | 6,476       | 116      | 4,355                          | 4,330       | 17,899     | 6.5%                   |
|       | Embryo 26-27 | 56               | Calvarial bone | IF <sup>e</sup> staining                    |        |             |          |                                |             |            |                        |

<sup>a</sup>WPC: weeks post conception; <sup>b</sup>Dpf: days post fertilization; <sup>c</sup>QC: quality control; <sup>d</sup>Perc.mito: percentage of mitochondrial genes; <sup>e</sup>IF: immunofluorescence

**b**

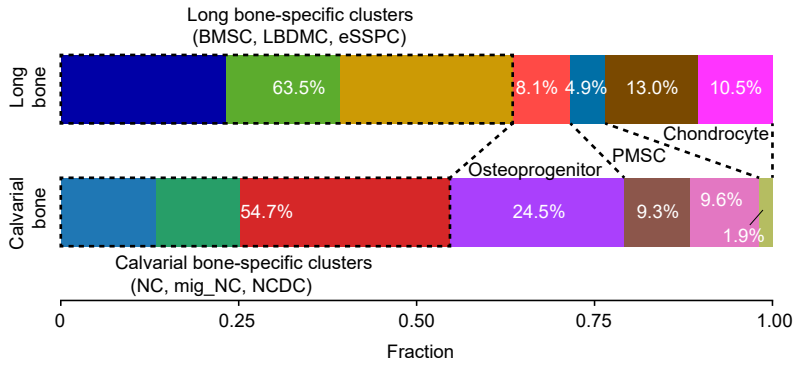

**c**

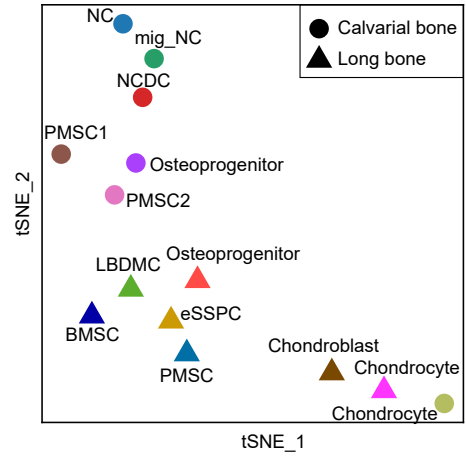

**d**

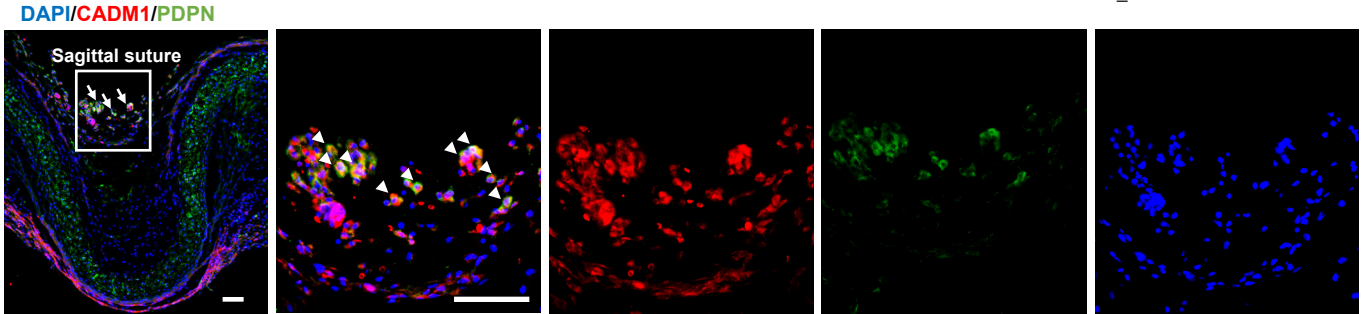

**e**

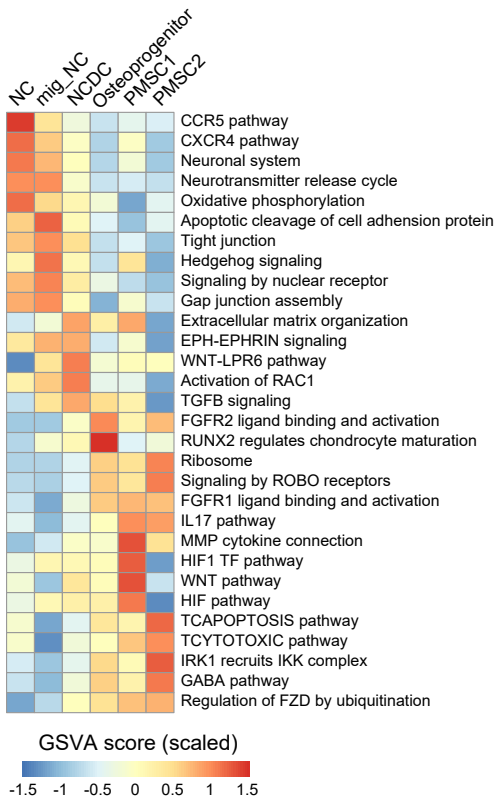

**f**

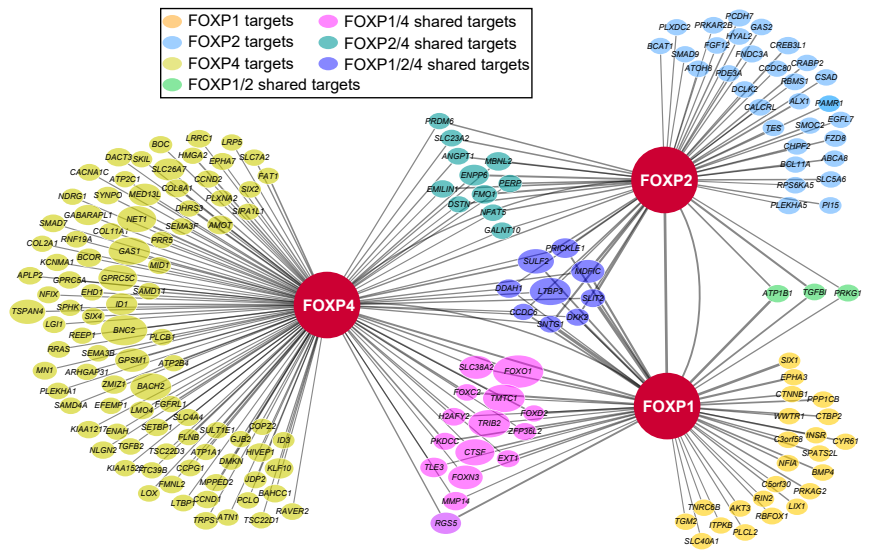

**Supplementary Fig. 6.** Further characterizations of human embryonic calvaria

**a,** Table summary of the 8 WPC human embryonic calvarial bone samples for scRNA-seq and immunostaining.

**b,** Stacked bar charts comparing the distribution of 8 WPC long bone and calvarial subsets. Dashed boxes indicated skeletal site-specific clusters. The three shared clusters (osteoprogenitor, PMSC and chondrocyte) were highlighted by dash lines.

**c,** t-distributed stochastic neighbor embedding(t-SNE) projection of indicated subsets from long bones and calvarial bones to compare the transcriptomic similarities at the pseudo-bulk level.

**d,** Immunofluorescent images of PDPN<sup>+</sup>CADM1<sup>+</sup> cells in 8 WPC human calvarial bones. Snapshot image of the calvarial region surrounding sagittal suture was shown on the left. PDPN<sup>+</sup>CADM1<sup>+</sup> cells (arrows) were found in the outer layer of sagittal mesenchyme. Arrow heads indicated enlarged PDPN<sup>+</sup>CADM1<sup>+</sup> cells. Merged and single-channel images of DAPI (blue), CADM1 (red) and PDPN (green) were shown (n=2 embryos). Scale bars: 100  $\mu$ m.

**e,** Heatmap showing pathways differentially enriched in calvarial bone subsets by GSVA, colored by scaled mean of GSVA scores.

**f,** The FOXP1/2/4 regulon network in 8 WPC human calvarial bone subsets. Line thickness indicated the level of GENIE3 weights. Dot size indicated the number of enriched TF-motif.
